# Supplementary material for: The histone H3K9 demethylase KDM3A promotes anoikis by transcriptionally activating pro-apoptotic genes BNIP3 and BNIP3L
Source: eLife. 2016 Jul 29;5:e16844. doi: 10.7554/eLife.16844 (PMC4991936; doi:10.7554/eLife.16844)
Supplement: Figure 1—source data 2. — DOI: http://dx.doi.org/10.7554/eLife.16844.005 [file elife-16844-fig1-data2.xlsx]

## Sheet: Fig. 1B
	Biological Replicate 1	Biological Replicate 2	Biological Replicate 3	Mean	SD	P-value
NS, attached	1.49	1.65	1.35	1.49667	0.150111
NS, detached (96h)	27	28.7	22.3	26	3.31512
BIM	3.61	10.9	6.91	7.14	3.65044	0.0027
KDM3A	10.8	8.87	7.37	9.01333	1.71949	0.0014
METAP1D	13.6	10.6	9.42	11.2067	2.15503	0.0029
P1H1D3	8.83	6.63	7.58	7.68	1.1034	0.0008
ZCCHC24	7.29	9.42	9.95	8.88667	1.40792	0.0012
ZNF345	7.58	12.3	11.5	10.46	2.52602	0.003
