# Supplementary material for: The histone H3K9 demethylase KDM3A promotes anoikis by transcriptionally activating pro-apoptotic genes BNIP3 and BNIP3L
Source: eLife. 2016 Jul 29;5:e16844. doi: 10.7554/eLife.16844 (PMC4991936; doi:10.7554/eLife.16844)
Supplement: Figure 2—source data 1. — DOI: http://dx.doi.org/10.7554/eLife.16844.011 [file elife-16844-fig2-data1.xlsx]

## Sheet: Fig. 2B
	Technical replicate 1	Technical replicate 2	Technical replicate 3	Technical replicate 4	Mean	SD	P-value
Attached	1	1	0.459329	1.9782	1.10938	0.632808
Detached (96h)	5.50303	7.19831	5.1	4.40925	5.55264	1.18644	0.0006
