# Supplementary material for: The histone H3K9 demethylase KDM3A promotes anoikis by transcriptionally activating pro-apoptotic genes BNIP3 and BNIP3L
Source: eLife. 2016 Jul 29;5:e16844. doi: 10.7554/eLife.16844 (PMC4991936; doi:10.7554/eLife.16844)
Supplement: Figure 3—source data 1. — DOI: http://dx.doi.org/10.7554/eLife.16844.014 [file elife-16844-fig3-data1.xlsx]

## Sheet: Fig. 3A
NS shRNA
	Technical Replicate 1	Technical Replicate 2	Technical Replicate 3	Mean	SD
BAD	0.453995	0.473658	0.423215	0.450289	0.0254249
BAK1	0.590923	0.571868	0.576808	0.579867	0.00988856
BAX	0.499291	0.540808	0.539568	0.526556	0.0236199
BBC3	1.05612	1.26231	1.06364	1.12736	0.116931
BID	0.894327	0.801915	0.74973	0.815324	0.0732251
BIK	0.783109	0.802114	0.824303	0.803175	0.0206174
BIM	1.82352	1.72181	1.78008	1.77514	0.0510332
BMF	6.87499	7.4481	6.80553	7.04287	0.352648
BNIP3	3.25374	3.31276	3.2058	3.25743	0.0535741
BNIP3L	2.92613	3.18406	2.91268	3.00762	0.152946
BOK	0.648773	0.625619	0.571897	0.61543	0.0394376
HRK	0.418015	0.427719	0.446508	0.430747	0.0144863
HUWE1	0.820024	0.776426	0.794595	0.797015	0.0218995
PMA1P1	0.330756	0.323034	0.313128	0.322306	0.00883615
KDM3A shRNA
	Technical Replicate 1	Technical Replicate 2	Technical Replicate 3	Mean	SD	P value
BAD	0.570136	0.621579	0.48223	0.557982	0.0704648	0.0674848
BAK1	0.833296	0.818732	0.792052	0.814693	0.0209167	6.14877e-05
BAX	0.977882	0.988312	0.915651	0.960615	0.0392874	8.09176e-05
BBC3	0.729983	0.757421	0.699233	0.728879	0.0291097	0.00460013
BID	0.922862	0.862806	0.787892	0.857853	0.0676212	0.500898
BIK	0.886	0.783989	0.702527	0.790838	0.0919281	0.831696
BIM	2.93139	2.859	2.72	2.8368	0.10743	0.000102139
BMF	7.99406	7.92155	8.25404	8.05655	0.174835	0.011155
BNIP3	0.488499	0.577415	0.548829	0.538248	0.0453926	2.96022e-07
BNIP3L	0.972943	0.969703	0.832065	0.924904	0.0804168	3.11123e-05
BOK	0.950461	1.03153	0.909623	0.963872	0.062051	0.0012003
HRK	0.970806	1.00097	0.630369	0.867383	0.205813	0.021476
HUWE1	0.706386	0.685389	0.654179	0.681985	0.0262698	0.00432473
PMA1P1	0.703559	0.729726	0.705496	0.712927	0.0145806	2.40909e-06

## Sheet: Fig. 3C
BNIP3
Attached
	Technical Replicate 1	Technical Replicate 2	Mean	SD
BNIP3	1.56295	1.21179	1.38737	0.248313
NCR	1.84368	1.61543	1.72956	0.161398
Detached (24 h)
	Technical Replicate 1	Technical Replicate 2	Mean	SD	P value (unpaired, two-tailed t test)
BNIP3	5.4213	5.81733	5.61932	0.280038	0.00388802
NCR	1.0278	1.98781	1.5078	0.678827	0.697112
BNIP3L
Attached
	Technical Replicate 1	Technical Replicate 2	Mean	SD
BNIP3	0.790804	0.897693	0.844248	0.0755817
NCR	1.0738	1.00363	1.03872	0.0496149
Detached (24 h)
	Technical Replicate 1	Technical Replicate 2	Mean	SD	P value (unpaired, two-tailed t test)
BNIP3	4.33548	5.19279	4.76414	0.606211	0.0119274
NCR	1.68772	0.685744	1.18673	0.708506	0.795979

## Sheet: Fig. 3D
BNIP3
Attached, NS shRNA
	Technical Replicate 1	Technical Replicate 2	Mean	SD	P value
BNIP3	7.74985	8.20085	7.97535	0.318905	0.00674692
NCR	0.954799	1.05566	1.00523	0.0713164
Detached (24 h), NS shRNA
	Technical Replicate 1	Technical Replicate 2	Mean	SD
BNIP3	1.73373	2.58184	2.15778	0.599708
NCR	1.8316	2.51178	2.17169	0.48096
Detached (24 h), KDM3A shRNA
	Technical Replicate 1	Technical Replicate 2	Mean	SD	P value
BNIP3	8.1756	8.45432	8.31496	0.197087	0.00521459
NCR	1.55862	1.4905	1.52456	0.048166
BNIP3L
Attached, NS shRNA
	Technical Replicate 1	Technical Replicate 2	Mean	SD	P value
BNIP3L	13.3958	13.6624	13.5291	0.188493	0.000123168
NCR	0.734159	1.15521	0.944682	0.297725
Detached (24 h), NS shRNA
	Technical Replicate 1	Technical Replicate 2	Mean	SD
BNIP3L	1.44766	1.47425	1.46095	0.0187963
NCR	0.653525	0.65348	0.653502	3.18198e-05
Detached (24 h), KDM3A shRNA
	Technical Replicate 1	Technical Replicate 2	Mean	SD	P value
BNIP3L	11.9953	12.262	12.1287	0.188578	0.000157762
NCR	1.94128	2.08502	2.01315	0.10164

## Sheet: Fig. 3E
	Biological Replicate 1	Biological Replicate 2	Biological Replicate 3	Mean	SD	P-value
NS	20	21.4	22.3	21.2333	1.15902
BNIP3	14.9	8.73	3.47	9.03333	5.72103	0.0223567
BNIP3L	10.6	11.4	5.73	9.24333	3.06882	0.00318668
