# Supplementary material for: The histone H3K9 demethylase KDM3A promotes anoikis by transcriptionally activating pro-apoptotic genes BNIP3 and BNIP3L
Source: eLife. 2016 Jul 29;5:e16844. doi: 10.7554/eLife.16844 (PMC4991936; doi:10.7554/eLife.16844)
Supplement: Figure 4—source data 1. — DOI: http://dx.doi.org/10.7554/eLife.16844.022 [file elife-16844-fig4-data1.xlsx]

## Sheet: Fig. 4A
Attached
	Technical Replicate 1	Technical Replicate 2	Technical Replicate 3	Mean	SD
MCF10A	1.4	1.59	2.66	1.88333	0.679289
BT549	1.14	0.89	0.62	0.883333	0.260064
MDA-MB-231	1.76	1.87	1.79	1.80667	0.0568624
MCF7	1.08	1.12	0.97	1.05667	0.0776745
SUM149	1.19	0.99	1.24	1.14	0.132288
T47D	1.92	2.5	2.42	2.28	0.314325
Detached (96h)
	Technical Replicate 1	Technical Replicate 2	Technical Replicate 3	Mean	SD	P-value
MCF10A	32.3	29.5	30.4	30.7333	1.42945
BT549	2.29	2.44	1.43	2.05333	0.545008	5.36314e-06
MDA-MB-231	13.3	8.61	10.2	10.7033	2.38517	0.000237375
MCF7	4.98	1.13	1.18	2.43	2.20851	4.88183e-05
SUM149	0.085	0.064	0.053	0.0673333	0.0162583	3.13312e-06
T47D	0.51	0	0.34	0.283333	0.259679	3.43753e-06

## Sheet: Fig. 4C
Attached
	Technical Replicate 1	Technical Replicate 2	Technical Replicate 3	Mean	SD
MCF10A	1	0.98067	0.997262	0.992644	0.0104596
BT549	1	0.815422	0.721826	0.845749	0.141545
MDA-MB-231	1	1.16807	1.11717	1.09508	0.086187
MCF7	0.92134	1	0.885204	0.935515	0.058696
SUM149	1	1.13904	1.14323	1.09409	0.0815113
T47D	1	1.00616	1.00391	1.00335	0.0031149
Detached (24 h)
	Technical Replicate 1	Technical Replicate 2	Technical Replicate 3	Mean	SD	P-value
MCF10A	6.22093	5.44482	5.50972	5.72516	0.430579
BT549	0.372105	0.246811	0.205894	0.274937	0.0866017	2.77119e-05
MDA-MB-231	0.963954	1.14192	1.10719	1.07102	0.0943344	5.25869e-05
MCF7	3.08148	2.66298	2.60503	2.78316	0.259973	0.000534359
SUM149	1.72182	1.71201	1.88673	1.77352	0.0981653	0.000101173
T47D	3.64029	3.73741	3.56974	3.64915	0.0841823	0.00120744

## Sheet: Fig. 4E
	Technical replicate 1	Technical replicate 2	Technical replicate 3	Mean	SD	P value		Additional P value comparisons
Normal	0.599614	0.689965	0.644086	0.644555				Comparison	P value
Normal	0.806159	0.779174	1.17742	0.920919				ER- HER2+ vs TN	0.4117
Normal	0.945794	0.963256	0.919735	0.942928				ER+ HER2+ vs TN	0.2734
Normal	1.2233	1.2147	1.23823	1.22541				ER+ HER2- vs TN	0.6163
Normal	1.63187	1.65912	1.68145	1.65748				ER+ HER2+ vs ER- HER2+	0.1995
				1.07826	0.38351			ER+ HER2- vs ER- HER2+	0.7927
								ER+ HER2- vs ER+ HER2+	0.2066
TN	0.0898504	0.0885003	0.0932277	0.0905261
TN	0.066914	0.122569	0.114094	0.101192
TN	0.0708286	0.0693701	0.0698379	0.0700122
TN	0.0740357	0.0838735	0.0815712	0.0798268
				0.0853893	0.01346	0.00439588
ER- HER2+	0.0587579	0.0637155	0.0551737	0.0592157
ER- HER2+	0.0679283	0.0666147	0.0686422	0.0677284
ER- HER2+	0.0589079	0.0517401	0.038217	0.0496216
ER- HER2+	0.111496	0.133809	0.139555	0.128287
ER- HER2+	0.215375	0.219216	0.216756	0.217116
ER- HER2+	0.139951	0.126178	0.120524	0.128884
ER- HER2+	0.0883206	0.0967856	0.0789042	0.0880035
				0.105551	0.058483	0.00445199
ER+ HER2+	0.124129	0.116672	0.115761	0.118854
ER+ HER2+	0.0627438	0.0644492	0.0497619	0.058985
ER+ HER2+	0.04632	0.0522722	0.0518401	0.0501441
ER+ HER2+	0.050915	0.0614591	0.0534459	0.0552733
ER+ HER2+	0.0429096	0.0503187	0.0480609	0.0470964
				0.0660705	0.0298602	0.00445199
ER+ HER2-	0.189696	0.206163	0.188184	0.194681
ER+ HER2-	0.0961029	0.0799889	0.0999165	0.0920028
ER+ HER2-	0.0677766	0.0565159	0.0617311	0.0620078
ER+ HER2-	0.120171	0.120646	0.0994645	0.113427
ER+ HER2-	0.0496458	0.0447505	0.0441867	0.0461944
ER+ HER2-	0.0659301	0.0675986	0.0536565	0.0623951
ER+ HER2-	0.0895683	0.0953722	0.0777629	0.0875678
ER+ HER2-	0.132748	0.132134	0.117256	0.12738
				0.098207	0.0475692	0.00445199

## Sheet: Fig. 4F
	Biological Replicate 1	Biological Replicate 2	Biological Replicate 3	Biological Replicate 4	Mean	SD	P value
NS shRNA	5	6	2	0	3.25	2.75379
Kdm3a shRNA	24	32	30	20	26.5	5.50757	0.000279824

## Sheet: Fig. 4H
NS shRNA
	Biological replicate 1	Biological replicate 2	Biological replicate 3	Biological replicate 4	Biological replicate 5	Biological replicate 6	Biological replicate 7	Mean	SEM
Day 8	49.8336	53.0145	59.1123	56.675	69.144	43.4106	90.2817	60.2103	5.85436
Day 12	192.423	65.45	218.079	100.246	95.0334	184.726	211.157	152.445	23.8968
Day 15	268.083	150.127	301.594	154.567	176.283	291.54	308.296	235.784	27.2618
Day 19	359.386	165.916	347.285	181.401	222.576	301.594	345.027	274.741	31.3828
Day 22	523.6	205.251	445.322	251.433	270.963	284.838	352.069	333.354	43.2183
Kdm3a shRNA
	Biological replicate 1	Biological replicate 2	Biological replicate 3	Biological replicate 4	Biological replicate 5	Biological replicate 6	Biological replicate 7	Biological replicate 8	Mean	SEM
Day 8	62.4581	55.3969	50.8939	95.0334	78.54	95.0334	44.3175	36.9452	64.8273	7.90524
Day 12	179.595	65.45	65.45	192.423	113.098	176.977	235.62	78.54	138.394	23.3078
Day 15	217.147	184.726	113.098	4.9	154.855	243.736	381.704	257.067	194.654	39.2198
Day 19	237.172	179.595	465.334	265.072	179.595	230.908	734.925	347.285	329.986	66.8786
Day 22	250.346	179.595	606.132	316.862	235.62	301.594	845.467	424.116	394.967	79.7207

## Sheet: Fig. 4I
NS shRNA	section	met area	section area	met burden (% area)	nb of mets	average burden	average nb mets
	1	0.0166	50.63	0.0327869	1	0.021385	0.75
	2		0	0	0
	3	0.00898	52.81	0.0170044	1
	4	0.0186	52.03	0.0357486	1
	1	0.006077	58.91	0.0103157	1	0.00905711	0.5
	2			0	0
	3	0.016211	62.56	0.0259127	1
	4			0	0
	1			0	0	0.034033	0.75
	2			0	0
	3	0.047	38.74	0.121322	2
	4	0.00597	40.31	0.0148102	1
	1			0	0	0.00173845	0.25
	2			0	0
	3			0	0
	4	0.00331	47.6	0.00695378	1
	1			0	0	0.00309198	0.25
	2			0	0
	3			0	0
	4	0.005688	45.99	0.0123679	1
	1	0.019	45.09	0.0421379	2	0.0490092	1.5
	2			0	0
	3	0.02475	48.19	0.0513592	2
	4	0.04522	44.1	0.10254	2
	1			0	0	0.0100841	0.25
	2			0	0
	3			0	0
	4	0.01703	42.22	0.0403363	1
						Mean	0.607143
Kdm3a shRNA
	section	met area	section area	met burden (% area)	nb of mets	average burden	average nb mets
	1	0.068	33.48	0.203106	3	0.0937832	1.25
	2	0		0	0
	3	0.07767	45.15	0.172027	2
	4	0		0	0
	1	0.0486	48.45	0.10031	4	0.21706	6.25
	2	0.07998	50.74	0.157627	7
	3	0.156	51.58	0.302443	8
	4	0.1547	50.25	0.307861	6
	1	0.01408	49.6	0.0283871	2	0.04834	2.5
	2	0.00519	56.78	0.00914054	1
	3	0.04087	54.16	0.0754616	4
	4	0.0425	52.88	0.0803707	3
	1	0.00975	38.12	0.0255771	1	0.0253352	1
	2	0		0	0
	3	0.00775	37.7	0.020557	1
	4	0.01829	33.13	0.0552068	2
	1	0.0146	38.95	0.037484	2	0.10167	2.25
	2	0.05555	45.71	0.121527	2
	3	0.1143	46.15	0.247671	5
	4	0		0	0
	1	0.01925	47.3	0.0406977	1	0.0603832	1.75
	2	0.0544	48.41	0.112373	3
	3	0.0346	47.14	0.0733984	2
	4	0.00692	45.94	0.0150631	1
	1	0.0809	31.4	0.257643	3	0.0839046	1.5
	2	0		0	0
	3	0.0325	41.68	0.077975	3
	4	0		0	0
	1	1.248	56.8	2.19718	7	2.36241	7.5
	2	1.377	62.63	2.19863	7
	3	1.532	57.54	2.6625	9
	4	1.26	52.69	2.39135	7
						Mean	3
						P value	1.08639e-05
